# Supplementary material for: First-principles investigation of an efficient non-noble single-atom catalyst Fe1/Ti2CO2 for formaldehyde oxidation
Source: Royal Society of Chemistry journal article supplement (doi:10.1039/d4cy00809j), 2024-01-01
Supplement: d4cy00809j1.pdf [file d4cy00809j1.pdf]

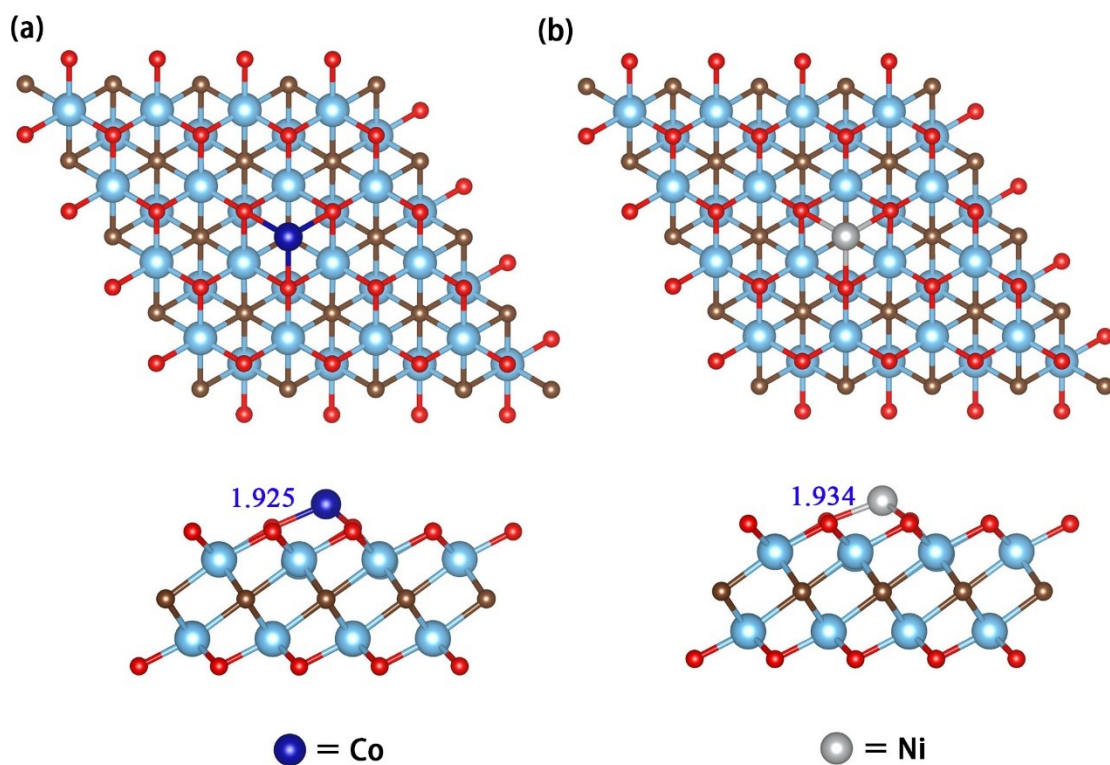

Figure S1. The most stable adsorption configuration of Co(a) and Ni(b) atoms on  $\text{Ti}_2\text{CO}_2$ .

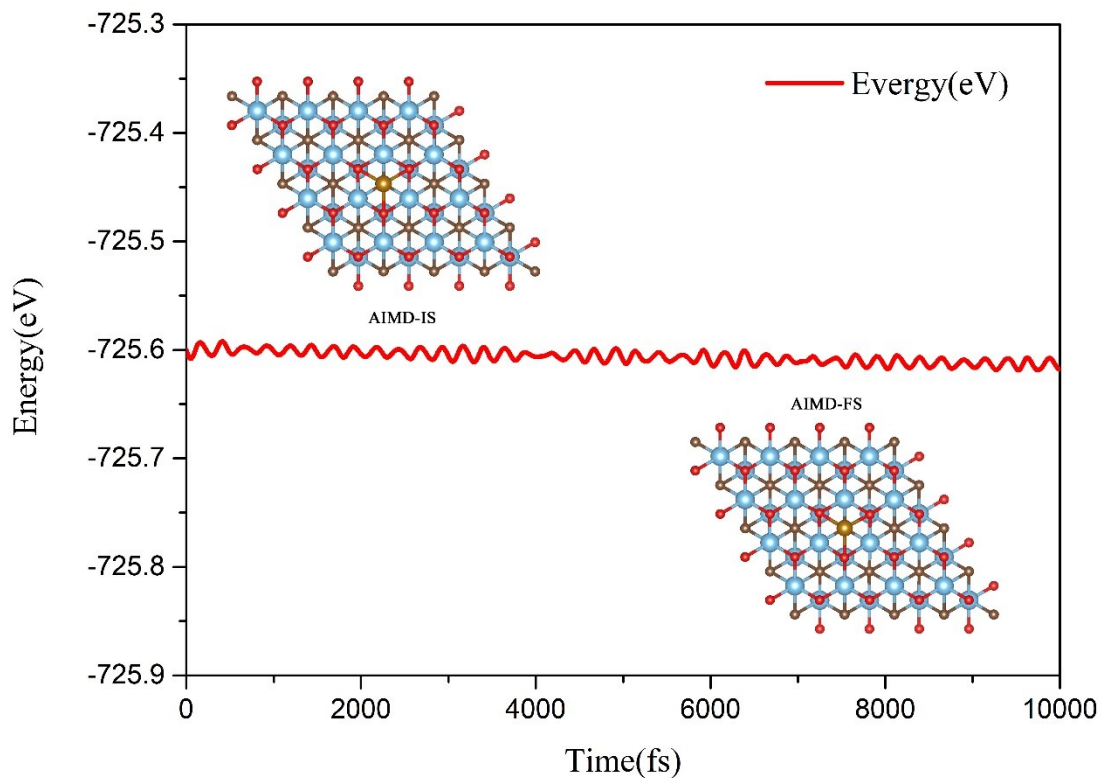

Figure S2. Energy curve within 10 ps at 300 K by AIMD (Ab initio molecular dynamics), the initial state (IS), and final state (FS) are shown in the figure.

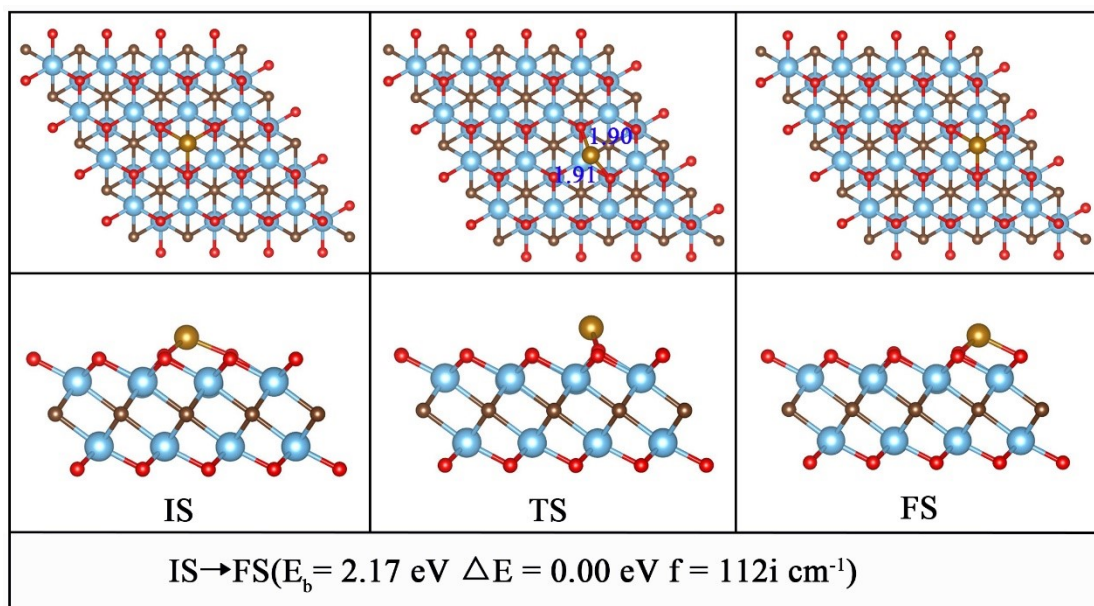

Figure S3. The schematic energy distribution of a single Fe atom moving from the most stable position(Site-B) on the Fe<sub>1</sub>/Ti<sub>2</sub>CO<sub>2</sub> monolayer to its adjacent position(Site-B).
